# Supplementary figures and images for: Inhibiting P2Y12 in Macrophages Induces Endoplasmic Reticulum Stress and Promotes an Anti-Tumoral Phenotype
Source: MDPI journal article supplement (doi:10.3390/ijms21218177), 2020-10-31

Figure 1E

Kaleidoscope Ladder

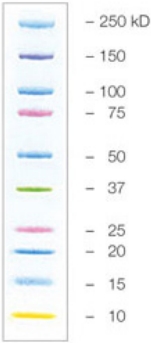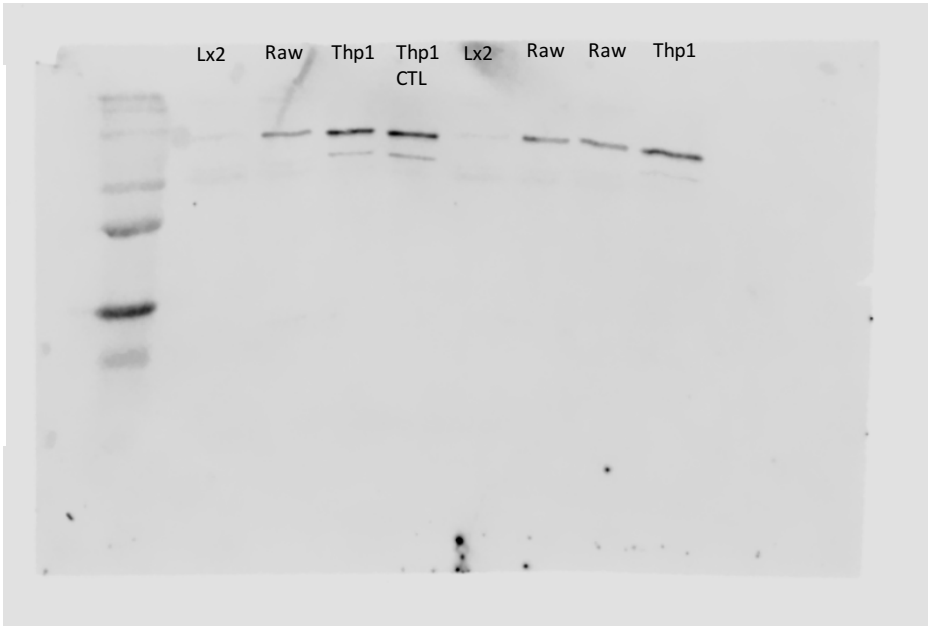

Figure 1H

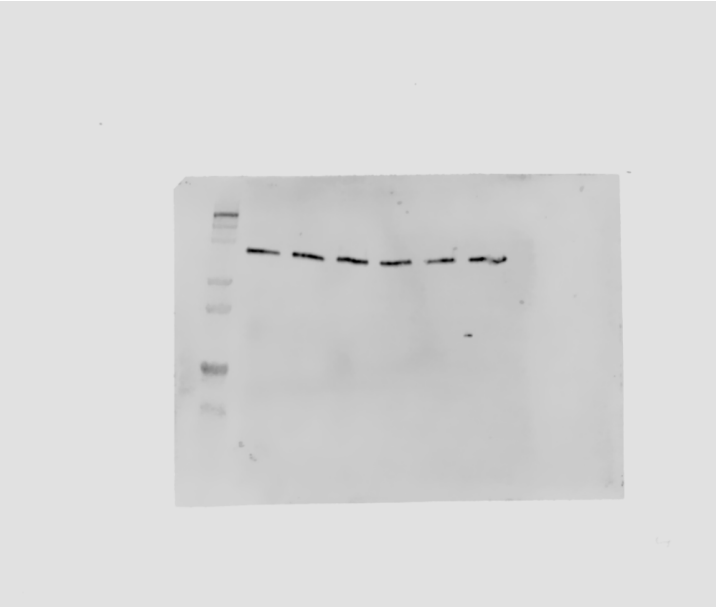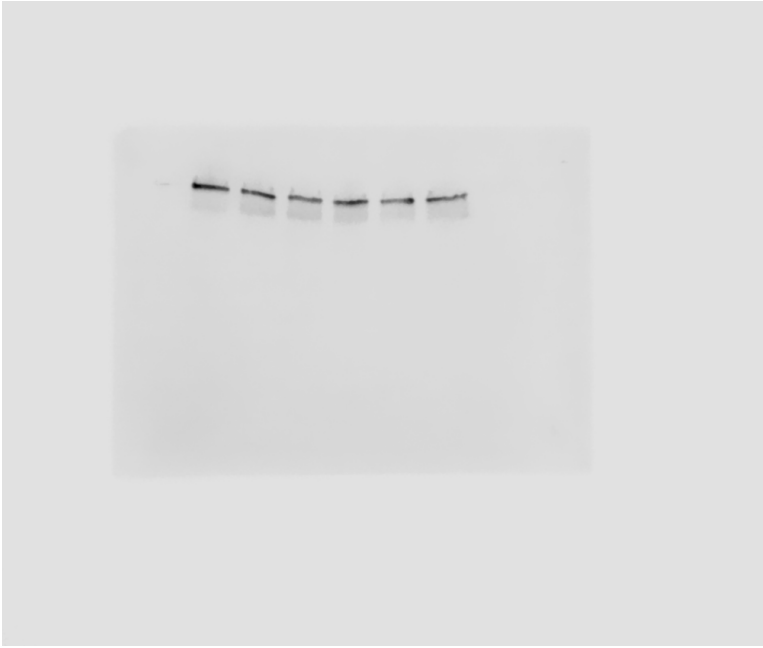

Supplement: s1 [file s1]
